# Supplementary material for: Issue Voting and Government Responsiveness to Policy Preferences
Source: Springer Nature journal article supplement (doi:10.1007/s11109-021-09716-8), 2021-05-12
Supplement: MOESM1 [file 19159002]

Issue Voting and Government Responsiveness to Policy  
Preferences  
Online Appendix

November 11, 2020

# Contents

|    |                                                                                                            |    |
|----|------------------------------------------------------------------------------------------------------------|----|
| 1  | List of Issues                                                                                             | 3  |
| 2  | Relationship Between Public Opinion and Policy Implementation in Broader Dataset                           | 6  |
| 3  | Assessing Issue Voting Using Logistic Regression Models                                                    | 7  |
| 4  | Assessing Issue Voting Using Linear Regression Models (With Party Identification)                          | 9  |
| 5  | Second-Stage Models Using Continuous Measures of Issue Voting                                              | 11 |
| 6  | Logistic Regression Models of Policy Implementation                                                        | 13 |
| 7  | Relationship Between Issue Voting and the Marginal Effect of Public Opinion                                | 15 |
| 8  | Models of Representation of the Preferences of Government Party Supporters                                 | 17 |
| 9  | Distributions of Public Support for Adopted Policies Among Govt-Party Supporters and Among All Respondents | 18 |
| 10 | Issue Voting and the Representation of Post-Election Govt-Party Supporters                                 | 19 |
| 11 | Public Support and Issue Voting for Incumbent and Non-Incumbent Governments                                | 21 |
| 12 | The Impact of Issue Voting on Policy Implementation by Year After the Election                             | 21 |
| 13 | Assessing the Influence of Individual Issues on the Relationship of Interest                               | 23 |
| 14 | Models Controlling for Whether the Government is Social Democratic                                         | 26 |
| 15 | Models Controlling for Whether the Government is a Minority                                                | 27 |
| 16 | Additional information about the data and policy implementation coding                                     | 27 |
| 17 | Analyses of Issue Voting and Responsiveness to High-Income Preferences                                     | 28 |

# 1 List of Issues

Table A1: Issues Included in Study

| Issue                                                                                                                                                                                  |
|----------------------------------------------------------------------------------------------------------------------------------------------------------------------------------------|
| 1 Introduce a six-hour working day<br>1976, 1985, 1988, 1991, 1994, 1998, 2002, 2006, 2010                                                                                             |
| 2 Nationalize large companies<br>1976, 1979, 1982, 1985                                                                                                                                |
| 3 Give men work instead of married women whose husbands already work<br>1968, 1979                                                                                                     |
| 4 Cancel wage-earner funds (Löntagarfonder)<br>1985, 1988, 1991                                                                                                                        |
| 5 Give employees more influence over their work<br>1976                                                                                                                                |
| 6 Increase the ability of public pension funds to buy stocks<br>1991, 1973                                                                                                             |
| 7 Transfer a portion of corporate profits to wage-earner funds<br>(Status quo question 1982 to 1990, reverse-coded. Possible change: cancel the funds)<br>1976, 1979, 1982, 1985, 1988 |
| 8 Give the state representation on the boards of big banks<br>(Status quo question, reverse-coded. Possible change: cancel the representation of state representatives.)<br>1968       |
| 9 Lower payroll taxes<br>1976                                                                                                                                                          |
| 10 Raise the carbon tax on gasoline<br>2010                                                                                                                                            |
| 11 Keep the wealth tax<br>(Status quo question, reverse coded. Possible policy change: cancel the wealth tax.)<br>2002, 2006                                                           |
| 12 Raise taxes on high incomes<br>1994                                                                                                                                                 |
| 13 Lower taxes on high incomes<br>1976, 1979, 1985, 1988                                                                                                                               |
| 14 Limit interest deductions for homeowners<br>1979, 1982                                                                                                                              |
| 15 Introduce tax deductions for household services<br>2006                                                                                                                             |
| 16 Remove tax deductions for household services<br>2010                                                                                                                                |
| 17 Support for the great tax reform completed this year<br>(Status quo question, reverse coded. Possible policy change: cancel the tax reform)<br>1991                                 |
| 18 Lower marginal rates, raise employer contributions,<br>and limit interest deductions<br>1982                                                                                        |
| 19 Introduce a sales tax<br>(Status quo question, reverse coded. Possible change: cancel the sales tax.)<br>1960                                                                       |
| 20 Introduce a property tax on the most highly taxed houses<br>2010                                                                                                                    |
| 21 Raise the tax on large wealth<br>1991                                                                                                                                               |
| 22 Lower taxes<br>1960, 1964, 1968, 1998, 2002, 2006, 2010                                                                                                                             |
| 23 Reduce the public sector<br>1998, 2002, 2006                                                                                                                                        |
| 24 Let private businesses run more childcare<br>1991                                                                                                                                   |
| 25 Close down unprofitable railway tracks<br>1976                                                                                                                                      |
| 26 Cancel the 'carer's allowance' for parents<br>1994, 2010                                                                                                                            |
| 27 Introduce 'carer's allowance' for parents<br>1985, 1991, 2006                                                                                                                       |
| 28 Legalize the use of cannabis<br>2002                                                                                                                                                |
| 29 Introduce 'Qualifying days' for sickness insurance<br>1982, 1991                                                                                                                    |

- 30 Raise wine and liquor prices to limit alcohol abuse and alcohol-related harm in society  
1979, 1991, 1994
- 31 Maintain the 'maximum fee' in childcare.  
(Status quo question, reverse coded. Possible policy change: cancel the 'maximum fee'.)  
2002
- 32 Stop selling 'mellanöl' (beer with 3,6% alcohol) in supermarkets  
1976
- 33 Let parents decide how to divide all parental leave days between them  
2006
- 34 Abolish the 'child benefit' for the first child  
1960
- 35 Keep the general law on 'occupational pension'  
(Status quo question, reverse coded. Possible policy change: cancel the 'occupational pension').  
1960, 1964
- 36 Raise the retirement age  
2010
- 37 Grant a legal right to a pension through a general pension  
1956
- 38 Reduce compensation from social insurance in case of illness  
1985
- 39 Introduce grades in school earlier than today  
2002
- 40 Teaching about religion should only provide students with knowledge about the religion and not promote Christianity  
1968
- 41 Stop plans to build a bridge over the Öresund (Copenhagen to Malmö)  
1991, 1994
- 42 Stop the construction of new coal plants  
1991
- 43 Keep nuclear power in the long run  
1979, 1982, 1985, 1988, 1991, 1994, 1998, 2002, 2006, 2010
- 44 Abolish nuclear power in the long term  
(Status quo question, reverse coded. The decision was to close down nuclear power in 2010  
and the possible change would be to continue allowing it)  
1979, 1998, 2002, 2006, 2010
- 45 Dispose of nuclear waste so that it cannot be accessed in the future  
1988, 1991, 1994, 1998
- 46 Forbid plastic bottles and aluminum cans  
1991
- 47 Ban private driving in cities  
1979, 1988, 1991, 1994, 1998, 2002, 2006
- 48 Decrease the Swedish wolf population  
2010
- 49 Build hydropower in the hitherto untouched rivers in northern Sweden  
1991, 1976
- 50 Ban the use of chemical pesticides in forests  
1979
- 51 Stop the expansion of nuclear power  
1976
- 52 Stop the expansion of nuclear power but keep existing nuclear plants  
1976
- 53 Reduce speed limits on the roads  
1991
- 54 Supporting the FRA law (National Defence Radio Establishment)  
(Status quo question, reverse coded. Possible change: not to implement the FRA law.)  
2010
- 55 Raise penalties for buying sex  
2006
- 56 Lower the four percent threshold to enter Parliament  
1991
- 57 Require half of MPs to be women  
1976, 1979
- 58 Introduce gender quotas for public boards and committees  
1994, 2010
- 59 Increase voters' ability to vote for individual candidates in Swedish elections  
1994, 1998
- 60 Make Sweden a republic with an elected president  
1976, 2010
- 61 Move more state offices from Stockholm to other parts of the country  
1976
- 62 Parliamentarians should be selected at once directly by voters  
1964
- 63 Stop the immigration of foreign laborers

- 1976, 2002
- 64 Accept fewer refugees in Sweden  
1988, 1991, 1994, 1998, 2002, 2006, 2010
- 65 Introduce a language test to become a Swedish citizen  
2002, 2006
- 66 Allow free download of all movies and music from the Internet  
2006
- 67 Decriminalize all file sharing on the Internet  
2010
- 68 Introduce advertising on TV  
1982, 1985, 1988
- 69 Strengthen the censorship of movies  
1968
- 70 Reduce foreign aid  
1982, 1985, 1988, 1991, 1994, 1998, 2002, 2006
- 71 Sweden should be neutral in its foreign policy  
(Status quo question, reverse coded. Possible change: join a military agreement with other countries.)  
1991
- 72 Ban all Swedish arms exports  
1985
- 73 Seek membership in NATO  
1998, 2002, 2006, 2010
- 74 Reduce the debts of third world countries  
2002
- 75 Stop foreign aid to Vietnam  
1979
- 76 Reduce defense spending  
1976, 1979, 1982, 1985, 1988, 1991, 1994, 1998, 2002, 2006, 2010
- 77 Sweden should join the EMU  
1998, 2002, 2006, 2010
- 78 Strengthen Swedish border controls  
2002
- 79 The relationship between the EC and Sweden is good as it is.  
(Status quo question, reverse coded. Possible change: join the European Community)  
1973
- 80 Sweden should withdraw from the EU  
1998, 2002, 2006, 2010
- 81 Sweden should join the EU  
1994, 1998, 2002, 2006
- 82 Sweden should try to join the EEC  
1968, 1988
- 83 Prohibit or restrict abortion  
1968, 1982, 1991, 1994, 1998, 2002, 2006,
- 84 Allow gay couples to adopt children  
(Status quo question, reverse coded. Possible change: stop allowing gay couples to adopt).  
2002, 2006
- 85 Allow active euthanasia  
1998
- 86 Prohibit all forms of pornography  
1976, 1979, 1982, 1985, 1991, 1994, 1998, 2002, 2006, 2010
-

## 2 Relationship Between Public Opinion and Policy Implementation in Broader Dataset

Figure A1: Public Support For Policy Proposals and their Implementation (SOM and SNES Data)

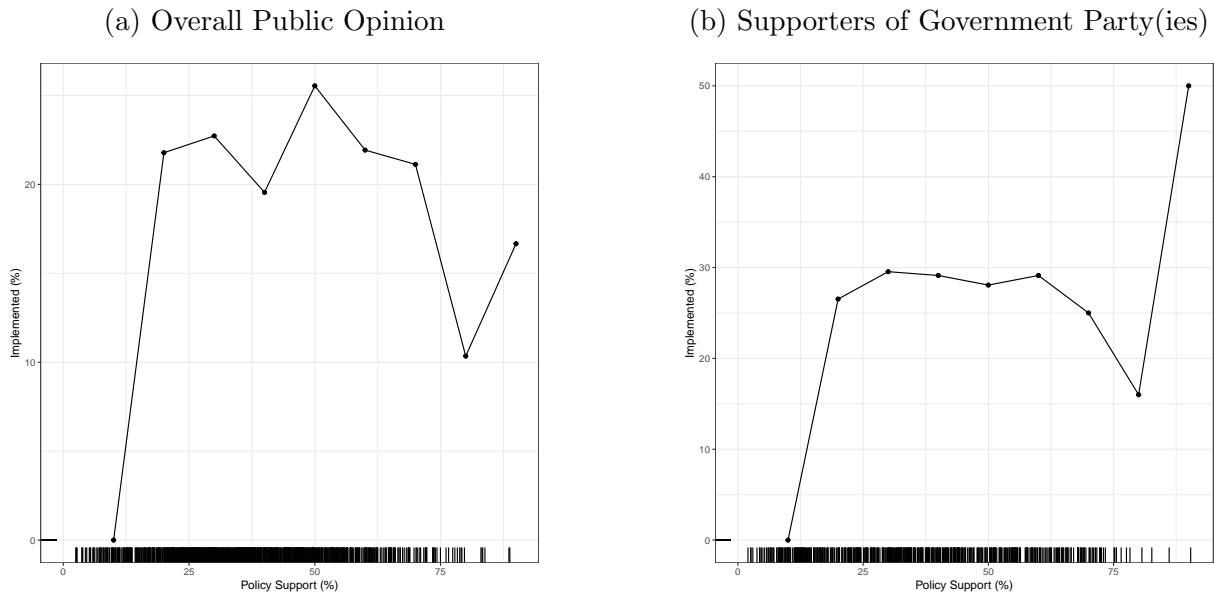

### 3 Assessing Issue Voting Using Logistic Regression Models

Table A2: Amount of issue voting

| Type                     | % p <sub>i</sub> >0.05 | Min  | Median | Max   | Mean  |
|--------------------------|------------------------|------|--------|-------|-------|
| Total                    | 36.6                   | 3.05 | 10.02  | 31.26 | 11.45 |
| Opposition-to-Government | 11.9                   | 4.95 | 9.08   | 20.19 | 11.18 |
| Government-to-Opposition | 24.8                   | 3.05 | 10.28  | 31.26 | 11.57 |

Table A3: Models of Issue Voting and Policy Implementation

|                                   | Model 1           | Model 2          | Model 3          |
|-----------------------------------|-------------------|------------------|------------------|
| Intercept                         | -0.52<br>(0.86)   | -0.90<br>(0.90)  | -0.67<br>(0.84)  |
| Public Support (%)                | -0.01<br>(0.02)   | -0.00<br>(0.02)  | -0.01<br>(0.02)  |
| Total IV                          | -1.42<br>(1.08)   |                  |                  |
| Opp-to-Gov IV                     |                   | -3.81<br>(2.95)  |                  |
| Gov-to-Opp IV                     |                   |                  | -0.77<br>(1.16)  |
| Total Changes                     | -12.33<br>(11.25) | -5.27<br>(12.36) | -9.36<br>(11.16) |
| Total IV*Public Support (%)       | 0.04<br>(0.03)    |                  |                  |
| Opp-to-Govt IV*Public Support (%) |                   | 0.11<br>(0.07)   |                  |
| Govt-to-Opp IV*Public Support (%) |                   |                  | 0.01<br>(0.03)   |
| Total Changes*Public Support (%)  | 0.33<br>(0.26)    | 0.09<br>(0.27)   | 0.19<br>(0.25)   |
| <i>N</i>                          | 202               | 152              | 178              |
| AIC                               | 236.85            | 185.69           | 203.97           |
| BIC                               | 316.25            | 258.27           | 280.33           |
| log <i>L</i>                      | -94.43            | -68.85           | -77.98           |

Standard errors in parentheses

† significant at  $p < .10$ ; \* $p < .05$ ; \*\* $p < .01$ ; \*\*\* $p < .001$

Figure A2: Types of Issue Voting and the Probability of Policy Implementation

(a) Total Issue Voting

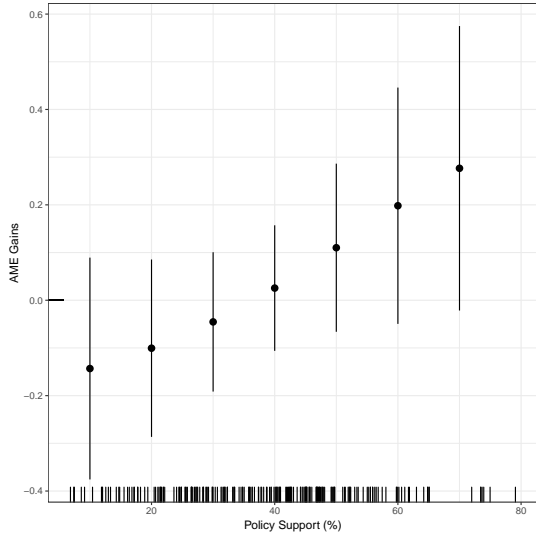

(b) Opposition-to-Government

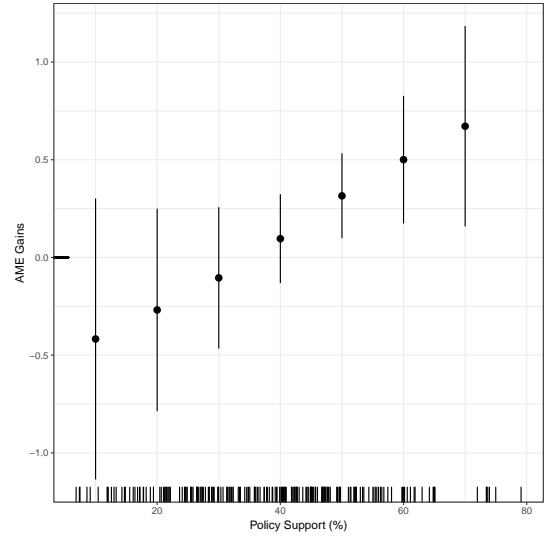

(c) Government-to-Opposition

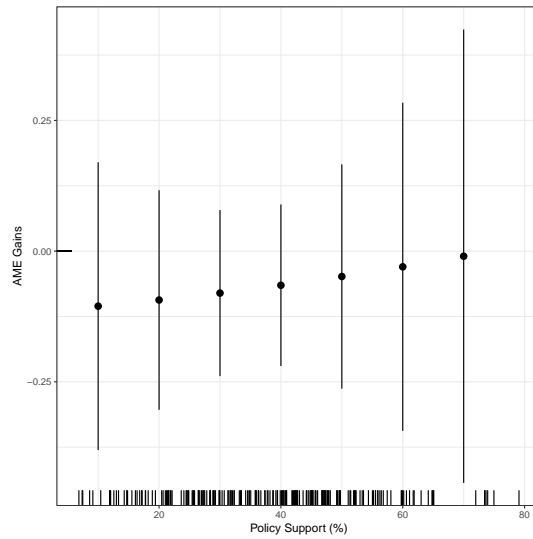



## 4 Assessing Issue Voting Using Linear Regression Models (With Party Identification)

Table A4: Amount of Issue voting

| Type                     | % p <sub>i</sub> 0.05 | Min  | Median | Max   | Mean |
|--------------------------|-----------------------|------|--------|-------|------|
| Total                    | 27.0                  | 3.56 | 6.66   | 17.30 | 7.42 |
| Opposition-to-Government | 7.6                   | 4.21 | 5.26   | 14.60 | 7.69 |
| Government-to-Opposition | 19.3                  | 3.56 | 6.85   | 17.30 | 7.31 |

Table A5: Models of Issue Voting and Policy Implementation

|                                  | Model 1           | Model 2           | Model 3           |
|----------------------------------|-------------------|-------------------|-------------------|
| Intercept                        | -0.58<br>(1.08)   | -0.81<br>(1.20)   | -0.83<br>(1.07)   |
| Public Support (%)               | -0.01<br>(0.02)   | 0.01<br>(0.03)    | 0.00<br>(0.02)    |
| Total IV                         | -0.81<br>(1.30)   |                   |                   |
| Opp-to-Gov IV                    |                   | -5.49<br>(5.15)   |                   |
| Gov-to-Opp IV                    |                   |                   | 0.42<br>(1.40)    |
| Total Changes                    | -15.49<br>(14.09) | -11.75<br>(16.68) | -11.67<br>(13.98) |
| Total IV*Public Support (%)      | 0.03<br>(0.03)    |                   |                   |
| Opp-to-Gov IV*Public Support (%) |                   | 0.17<br>(0.12)    |                   |
| Gov-to-Opp IV*Public Support (%) |                   |                   | -0.02<br>(0.04)   |
| Total Changes*Public Support(%)  | 0.31<br>(0.32)    | 0.09<br>(0.37)    | 0.15<br>(0.32)    |
| <i>N</i>                         | 171               | 138               | 158               |
| AIC                              | 204.74            | 163.27            | 183.78            |
| BIC                              | 280.13            | 233.52            | 257.29            |
| log <i>L</i>                     | -78.37            | -57.63            | -67.89            |

Standard errors in parentheses

† significant at  $p < .10$ ; \* $p < .05$ ; \*\* $p < .01$ ; \*\*\* $p < .001$

Figure A3: Types of Issue Voting and the Probability of Policy Implementation

(a) Total Issue Voting

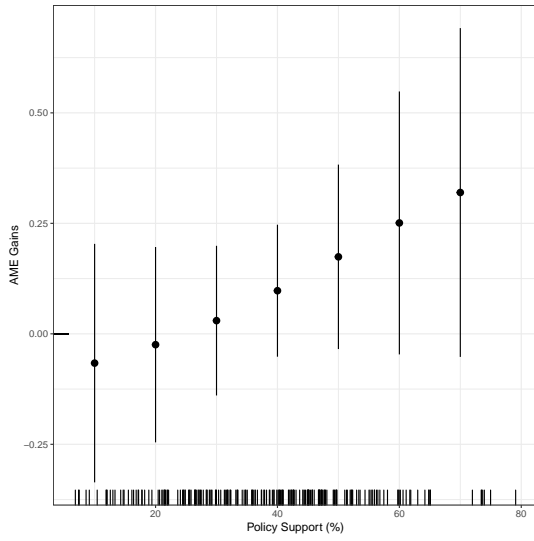

(b) Opposition-to-Government

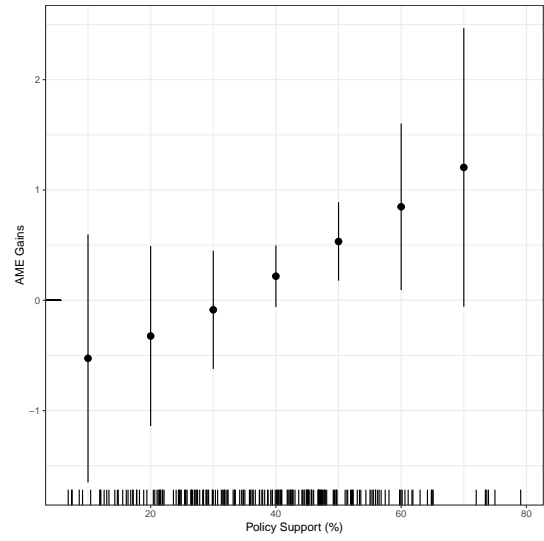

(c) Government-to-Opposition

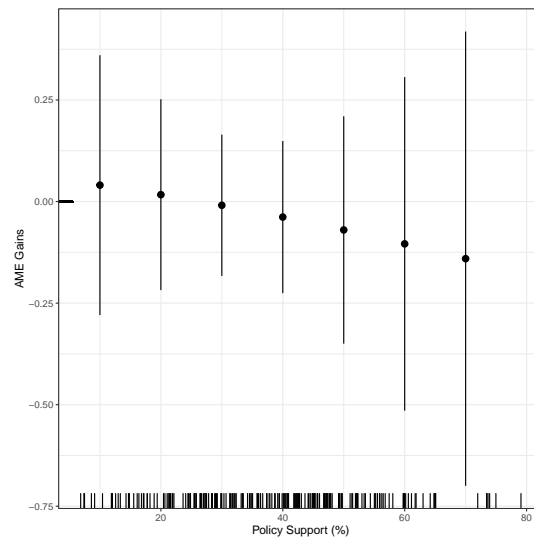

## 5 Second-Stage Models Using Continuous Measures of Issue Voting

Table A6: Models of Issue Voting and Policy Implementation with Continuous Measures of Issue Voting

|                                   | Model 1 | Model 2 | Model 3 |
|-----------------------------------|---------|---------|---------|
| Intercept                         | 0.32*   | 0.55*   | 0.24    |
|                                   | (0.16)  | (0.24)  | (0.19)  |
| Public Support (%)                | -0.00   | -0.01   | 0.00    |
|                                   | (0.00)  | (0.01)  | (0.00)  |
| Total IV                          | -0.01   |         |         |
|                                   | (0.01)  |         |         |
| Opp-to-Govt IV                    |         | -0.05   |         |
|                                   |         | (0.04)  |         |
| Govt-to-Opp IV                    |         |         | -0.02   |
|                                   |         |         | (0.02)  |
| Total Changes                     | -2.44   | -3.95   | -3.90†  |
|                                   | (1.98)  | (3.00)  | (2.20)  |
| Total IV*Public Support (%)       | 0.00†   |         |         |
|                                   | (0.00)  |         |         |
| Opp-to-Govt IV*Public Support (%) |         | 0.00*   |         |
|                                   |         | (0.00)  |         |
| Govt-to-Opp IV*Public Support (%) |         |         | 0.00    |
|                                   |         |         | (0.00)  |
| Total Changes*Public Support (%)  | 0.06    | 0.09    | 0.11*   |
|                                   | (0.05)  | (0.07)  | (0.05)  |
| <i>N</i>                          | 202     | 134     | 143     |
| <i>R</i> <sup>2</sup>             | 0.08    | 0.12    | 0.08    |
| adj. <i>R</i> <sup>2</sup>        | 0.05    | 0.09    | 0.04    |
| Resid. sd                         | 0.43    | 0.44    | 0.42    |

Standard errors in parentheses

† significant at  $p < .10$ ; \* $p < .05$ ; \*\* $p < .01$ ; \*\*\* $p < .001$

Figure A4: Public Support and the Marginal Effects of Continuous Measures of Issue Voting

(a) Total Issue Voting

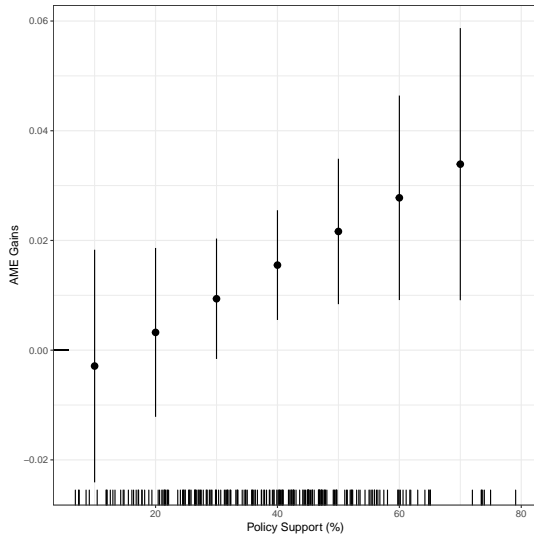

(b) Opposition-to-Government

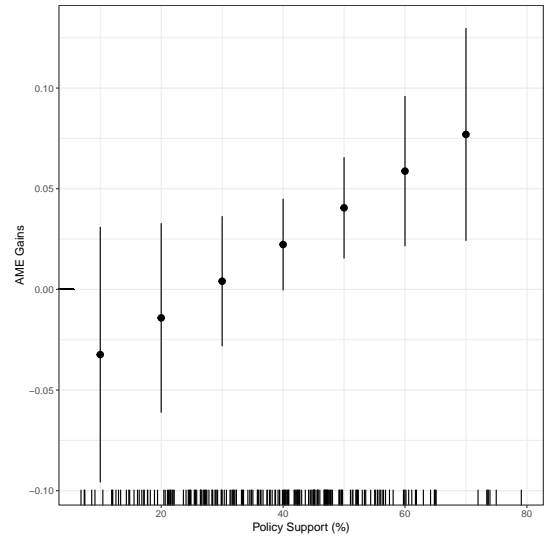

(c) Government-to-Opposition

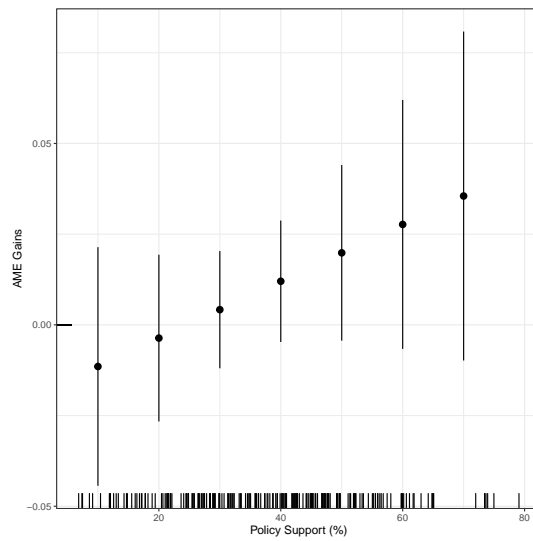

## 6 Logistic Regression Models of Policy Implementation

Note that these models use the linear models without controls for party identification for the first stage. These are the first stage results reported in the main text.

Table A7: Logistic Regression Models of Issue Voting and Policy Representation

|                                  | Model 1           | Model 2          | Model 3          |
|----------------------------------|-------------------|------------------|------------------|
| Intercept                        | -0.52<br>(0.85)   | -0.90<br>(0.90)  | -0.68<br>(0.84)  |
| Public Support (%)               | -0.01<br>(0.02)   | -0.00<br>(0.02)  | -0.01<br>(0.02)  |
| Total IV                         | -1.38<br>(1.08)   |                  |                  |
| Opp-to-Govt IV                   |                   | -4.07<br>(3.01)  |                  |
| Govt-to-Opp IV                   |                   |                  | -0.72<br>(1.16)  |
| Total Changes                    | -12.65<br>(11.21) | -5.70<br>(12.28) | -9.70<br>(11.10) |
| Total IV*Public Support (%)      | 0.04<br>(0.03)    |                  |                  |
| Opp-to-Govt IV*Public Support(%) |                   | 0.11 †<br>(0.07) |                  |
| Govt-to-Opp IV*Public Support(%) |                   |                  | 0.01<br>(0.03)   |
| Total Changes*Public Support(%)  | 0.33<br>(0.26)    | 0.10<br>(0.27)   | 0.20<br>(0.25)   |
| <i>N</i>                         | 202               | 151              | 178              |
| AIC                              | 237.24            | 185.33           | 203.72           |
| BIC                              | 316.64            | 257.74           | 280.08           |
| log <i>L</i>                     | -94.62            | -68.66           | -77.86           |

*Notes:* Standard errors in parentheses, \* indicates significance at  $p < 0.05$

Note that given the nonlinear nature of these models, the coefficient on the interaction term only gives the effect on the linear predictor (Ai and Norton, 2003; Berry, DeMeritt and Esarey, 2010). To assess the effect of the interaction on the probability of implementation, we must consider marginal effects.

Figure A5: Public Support and Marginal Effects of Each Type of issue Voting

(a) Total Issue Voting

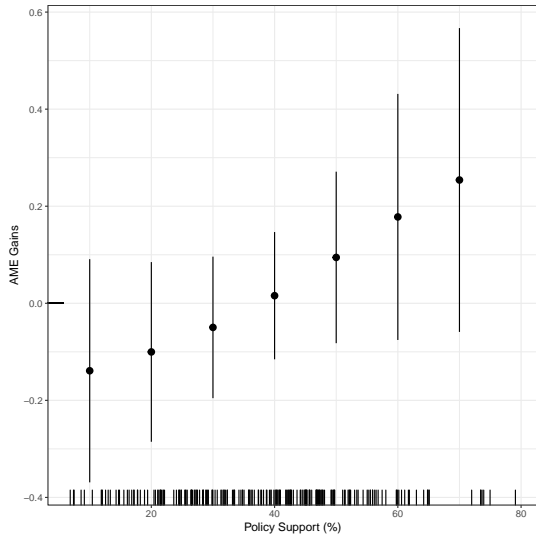

(b) Opposition-to-Government

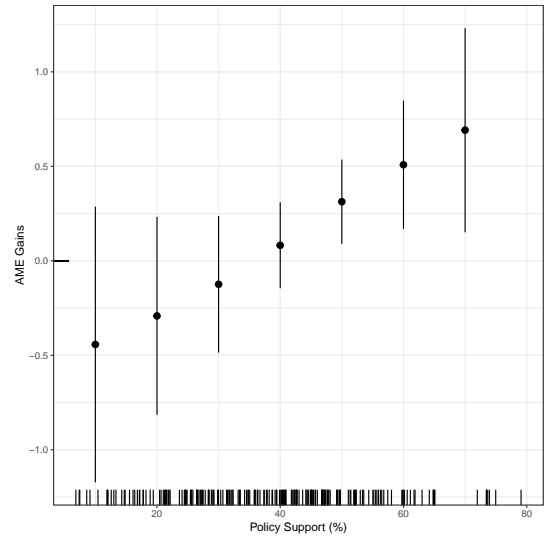

(c) Government-to-Opposition

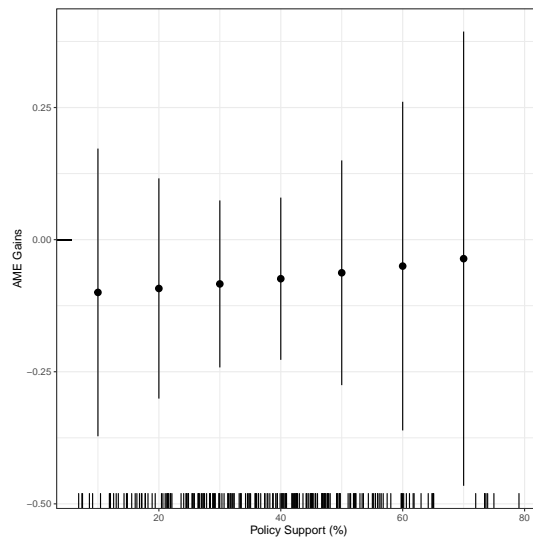

## 7 Relationship Between Issue Voting and the Marginal Effect of Public Opinion

We expected issue voting to increase the likelihood that popular policies are implemented. However, as Berry, Golder and Milton (2012) suggest, most theories involving interactions have implications for looking at the relationship the other way around. Not only do we expect issue voting to increase the probability that popular policies are implemented. We also expect public support for a policy change to matter more for the implementation of issue proposals that influence vote choice. In other words, the marginal effect of public support for a change should be larger when issue voting is significant, particularly when opposition-to-government issue voting is significant, than when it is not. The figures below assess these expectations about the other side of the interaction effect and finds that public support for a policy change does in fact matter more when opposition-to-government issue voting is significant. Note that the marginal effects presented below use the dichotomous measure of issue voting assessed using linear models which do not control for party identification.

Figure A6: Issue Voting and the Marginal Effect of Public Support

(a) Total Issue Voting

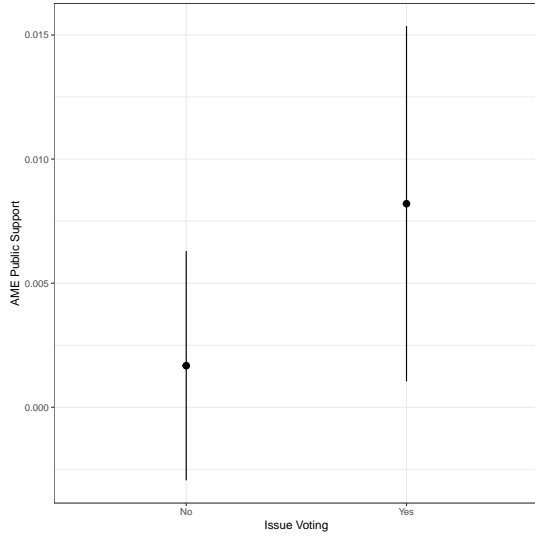

(b) Opposition-to-Government

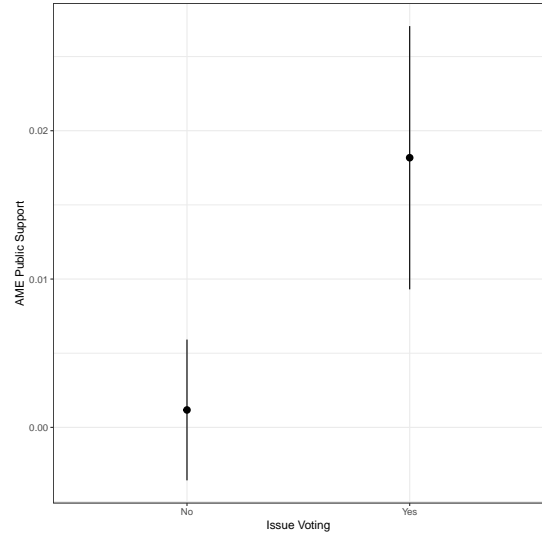

(c) Government-to-Opposition

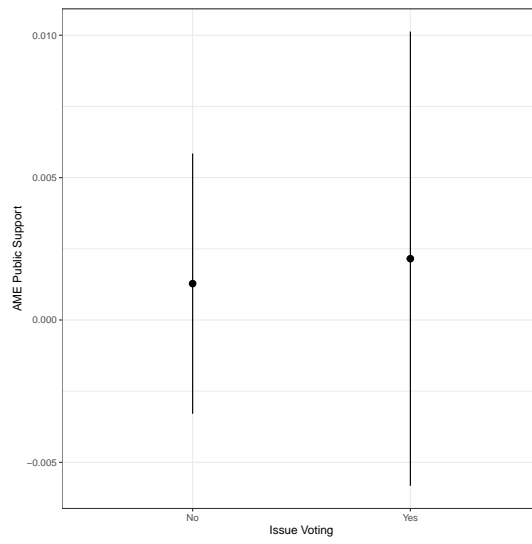



## 8 Models of Representation of the Preferences of Government Party Supporters

Table A8: Models of Representation of Government Party Supporters

|                                   | Model 1         | Model 2         | Model 3         |
|-----------------------------------|-----------------|-----------------|-----------------|
| Intercept                         | 0.21<br>(0.14)  | 0.11<br>(0.18)  | 0.20<br>(0.14)  |
| Policy Support (%)                | 0.00<br>(0.00)  | 0.00<br>(0.00)  | 0.00<br>(0.00)  |
| Total IV                          | -0.22<br>(0.14) |                 |                 |
| Opp-to-Govt IV                    |                 | -0.28<br>(0.34) |                 |
| Govt-to-Opp IV                    |                 |                 | -0.17<br>(0.15) |
| Total Changes                     | 0.44<br>(1.74)  | 2.08<br>(2.45)  | 0.56<br>(1.76)  |
| Total IV*Policy Support (%)       | 0.01*<br>(0.00) |                 |                 |
| Opp-to-Govt IV*Policy Support (%) |                 | 0.01<br>(0.01)  |                 |
| Govt-to-Opp IV*Policy Support (%) |                 |                 | 0.00<br>(0.01)  |
| Total Changes*Policy Support (%)  | -0.01<br>(0.04) | -0.05<br>(0.05) | -0.03<br>(0.04) |
| <i>N</i>                          | 202             | 151             | 178             |
| <i>R</i> <sup>2</sup>             | 0.05            | 0.05            | 0.02            |
| adj. <i>R</i> <sup>2</sup>        | 0.02            | 0.01            | -0.01           |
| Resid. sd                         | 0.44            | 0.45            | 0.43            |

Standard errors in parentheses

† significant at  $p < .10$ ; \* $p < .05$ ; \*\* $p < .01$ ; \*\*\* $p < .001$

## 9 Distributions of Public Support for Adopted Policies Among Govt-Party Supporters and Among All Respondents

Figure A7: Distributions of Public Support

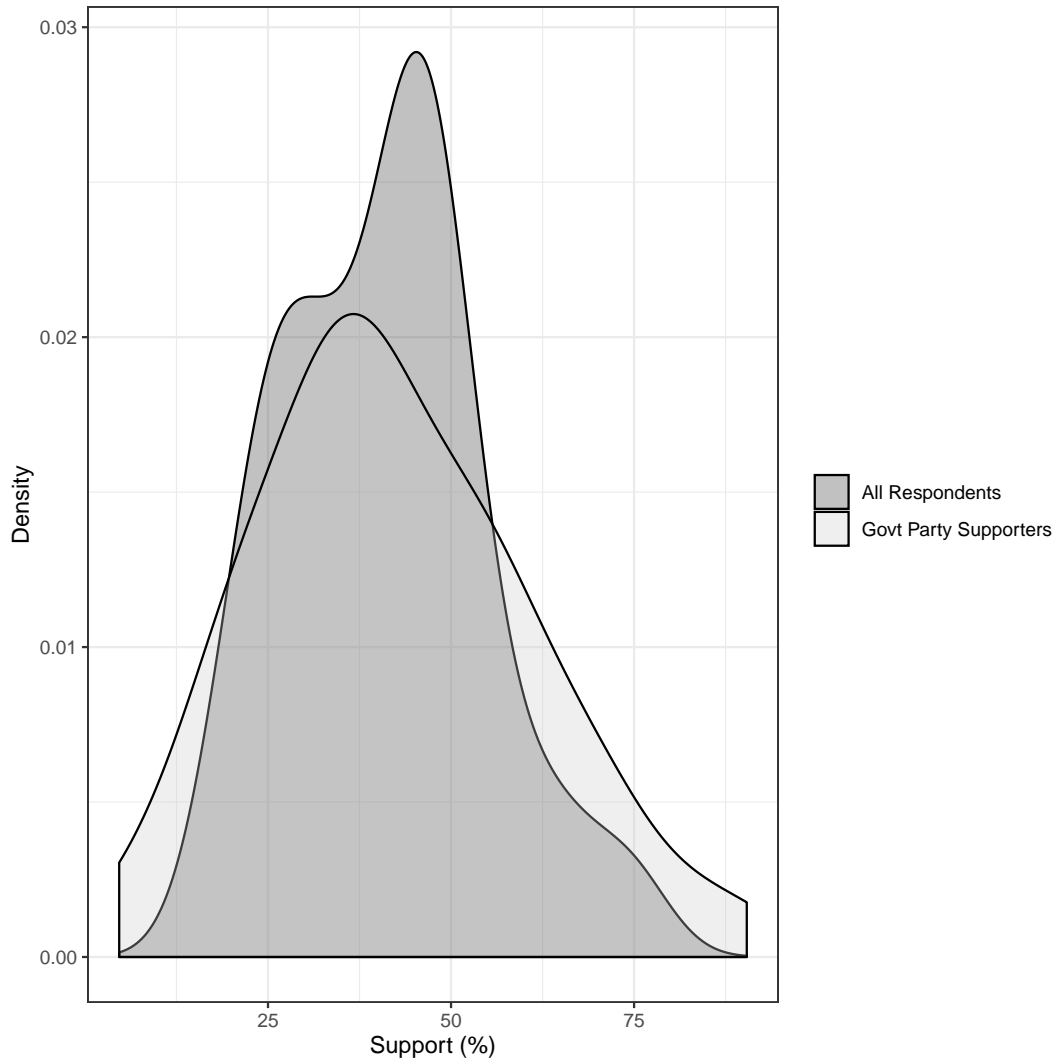

## 10 Issue Voting and the Representation of Post-Election Govt-Party Supporters

Table A9: Models of Implementation Among Post-Election Government-Party Supporters

|                                   | Model 1         | Model 2                     | Model 3         |
|-----------------------------------|-----------------|-----------------------------|-----------------|
| Intercept                         | 0.23<br>(0.14)  | 0.17<br>(0.18)              | 0.18<br>(0.14)  |
| Public Support (%)                | 0.00<br>(0.00)  | 0.00<br>(0.00)              | 0.00<br>(0.00)  |
| Total IV                          | -0.13<br>(0.14) |                             |                 |
| Opp-to-Govt IV                    |                 | -0.55<br>(0.41)             |                 |
| Govt-to-Opp IV                    |                 |                             | -0.06<br>(0.15) |
| Total Changes                     | -1.26<br>(1.72) | -0.24<br>(2.35)             | -0.47<br>(1.73) |
| Total IV*Public Support (%)       | 0.00<br>(0.00)  |                             |                 |
| Opp-to-Govt IV*Public Support (%) |                 | 0.01 <sup>†</sup><br>(0.01) |                 |
| Govt-to-Opp IV*Public Support (%) |                 |                             | 0.00<br>(0.00)  |
| Total Changes*Public Support (%)  | 0.03<br>(0.04)  | -0.00<br>(0.05)             | 0.01<br>(0.04)  |
| <i>N</i>                          | 202             | 151                         | 178             |
| <i>R</i> <sup>2</sup>             | 0.06            | 0.07                        | 0.02            |
| adj. <i>R</i> <sup>2</sup>        | 0.04            | 0.03                        | -0.01           |
| Resid. sd                         | 0.43            | 0.45                        | 0.43            |

Standard errors in parentheses

<sup>†</sup> significant at  $p < .10$ ; \* $p < .05$ ; \*\* $p < .01$ ; \*\*\* $p < .001$

Figure A8: Policy Support and the Marginal Effect of Issue Voting

(a) Total Issue Voting

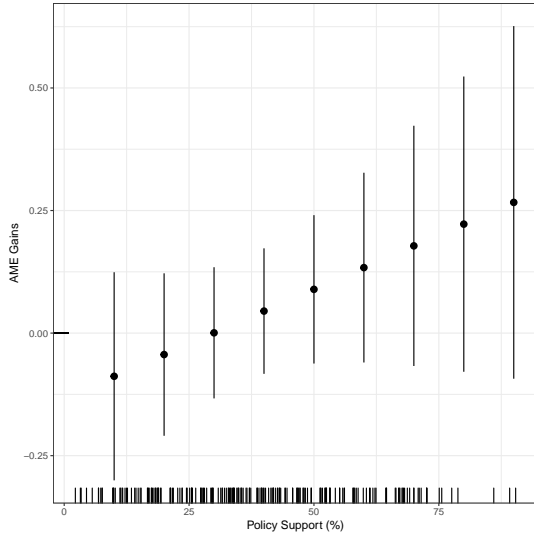

(b) Opposition-to-Government

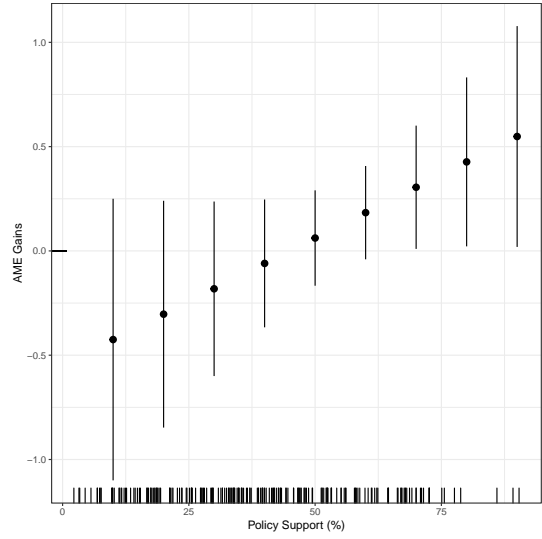

(c) Government-to-Opposition

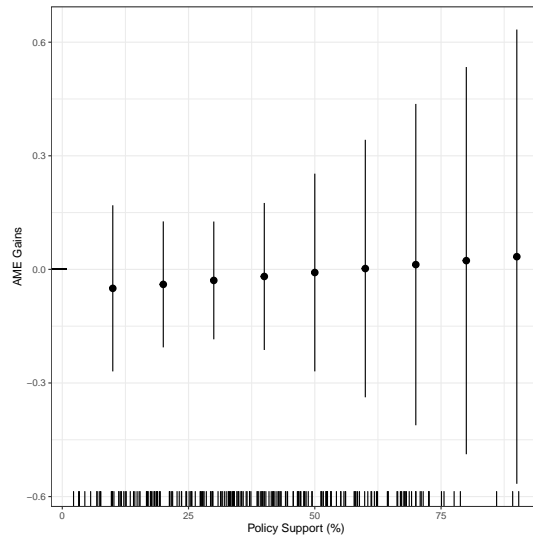

## 11 Public Support and Issue Voting for Incumbent and Non-Incumbent Governments

Figure A9: Public Support and Issue Voting

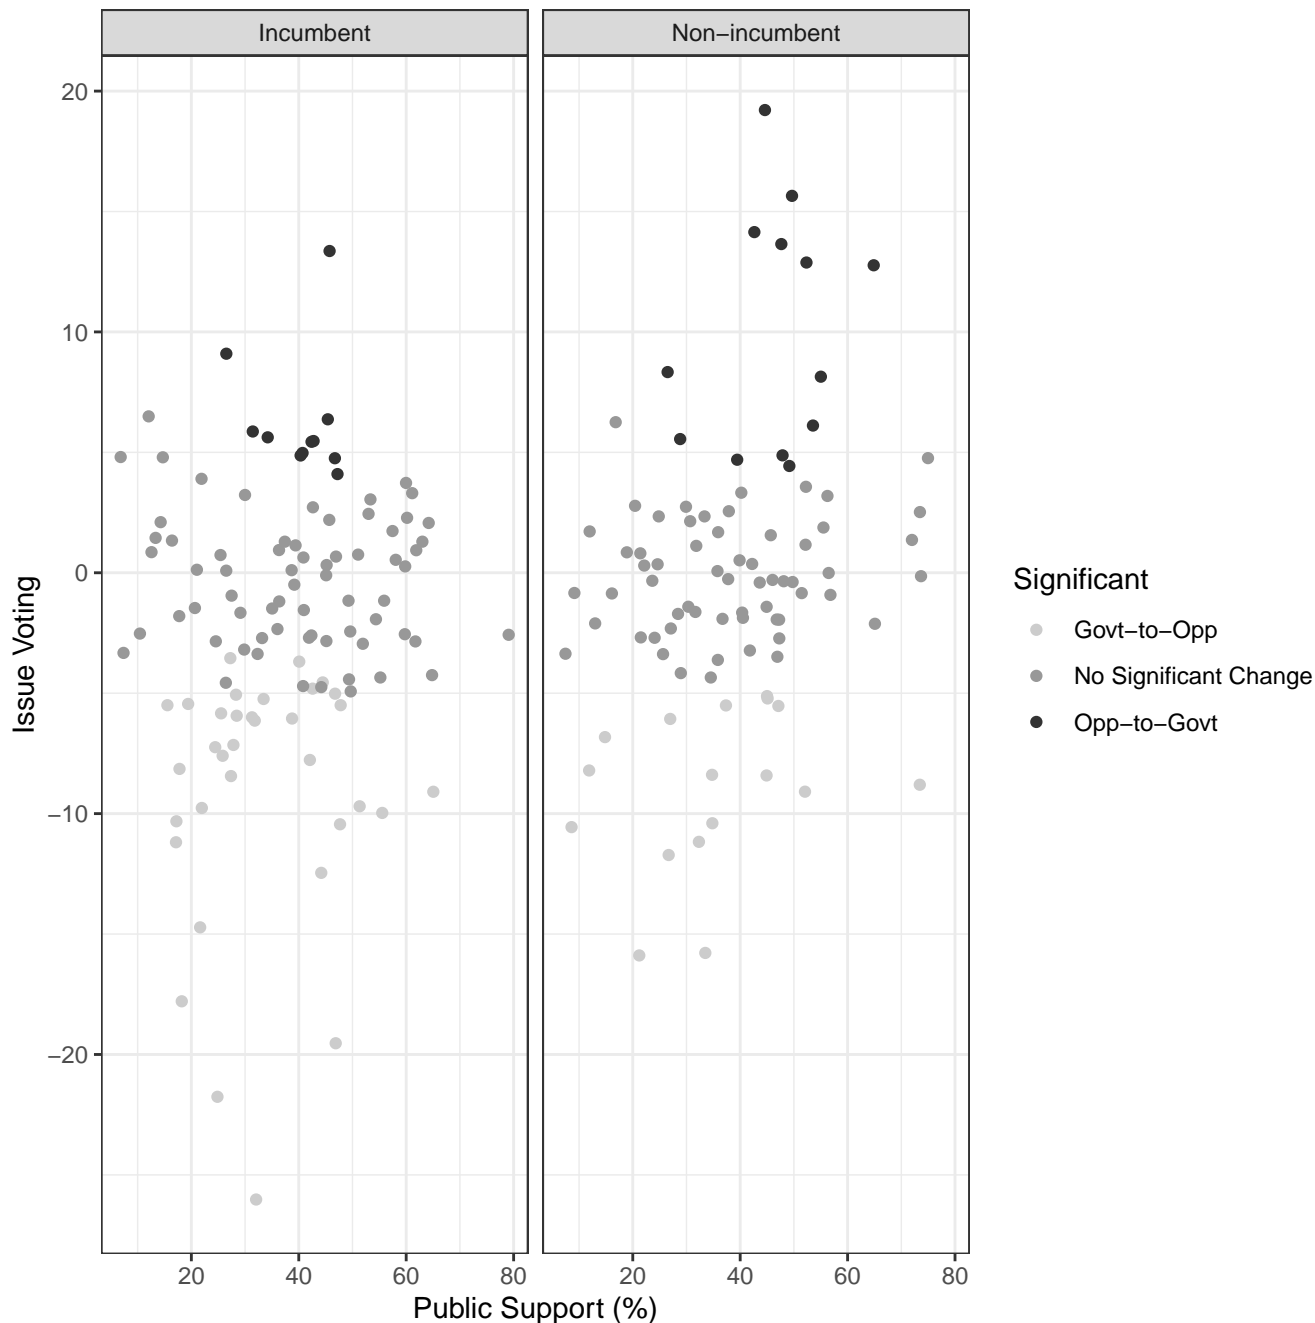

## 12 The Impact of Issue Voting on Policy Implementation by Year After the Election

The following figures are analogous to Figure 3(a) except they consider whether policies were implemented in each calendar year beginning the year of an election.

Figure A10: Issue Voting, Public Support and Policy Implementation

(a) Election Year

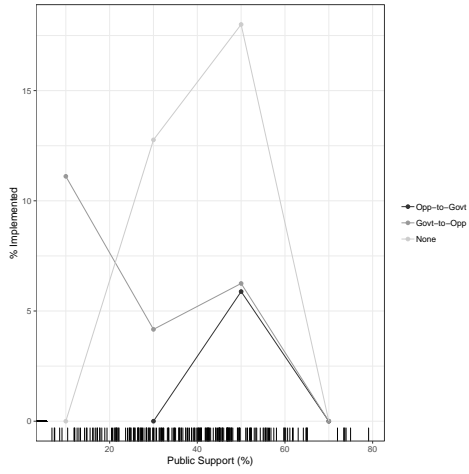

(b) After One Year

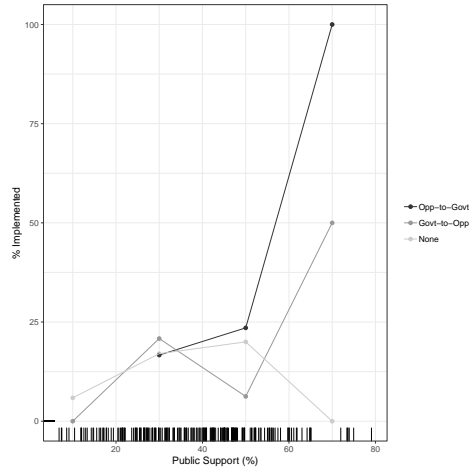

(c) After Two Years

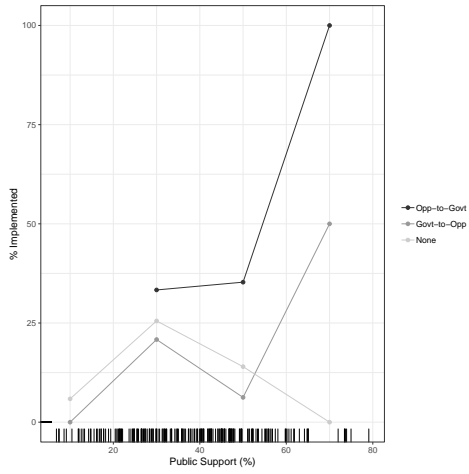

(d) After Three Years

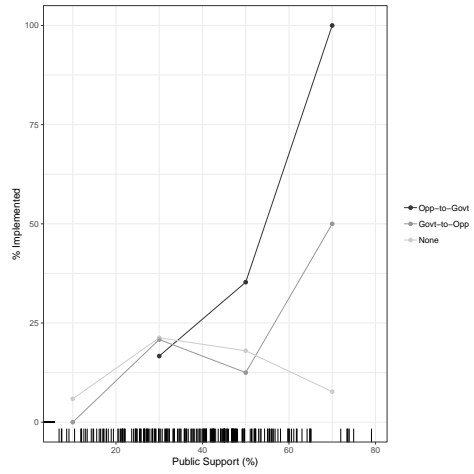

(e) After Four Years

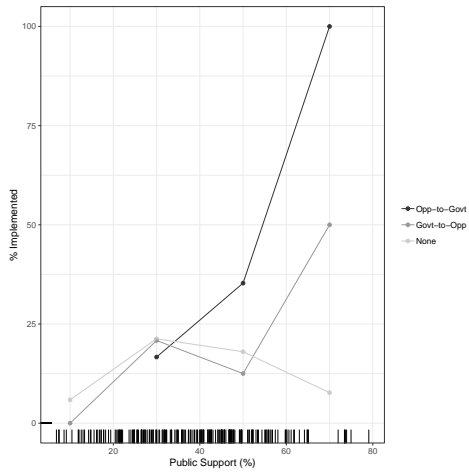

### 13 Assessing the Influence of Individual Issues on the Relationship of Interest

We re-ran Model 2 from Table 2 leaving out one issue at a time and consider the significance of the Opp-to-Gov IV\*Public Support (%) interaction coefficient. Figure A11 shows all the p-values. While 12 p-values were above 0.05, the highest p-value was below 0.10 (0.08).

Figure A11: P-Values of Coefficients on Interaction Term

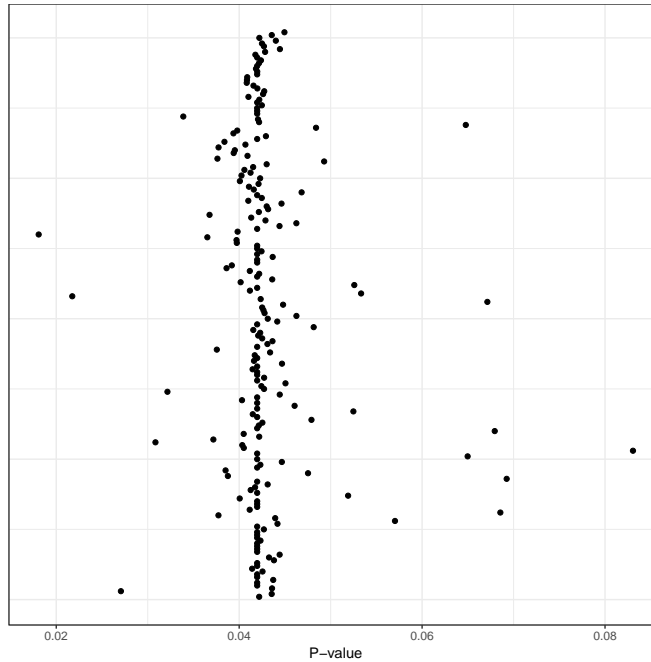

We also produced marginal effects plots (not shown) analogous to Figure 4(b) for all issues with p-values above 0.05 and find confidence intervals that only cover positive values for public support at 50 (%) and above in all cases. Results are thus not due to any one issue.

Moreover, we calculated DFBETA measures of influence for each observation on the Opp-to-Gov IV\*Public Support (%) interaction coefficient. Figure A12 shows these values along with dashed lines indicating the conventional cutoff for the absolute value of DFBETA ( $\frac{2}{\sqrt{N}}$ ) (Belsley, Kuh and Welsch, 1980). As we can see, all DFBETA values are far from the cutoffs.

Figure A12: DFBETAs

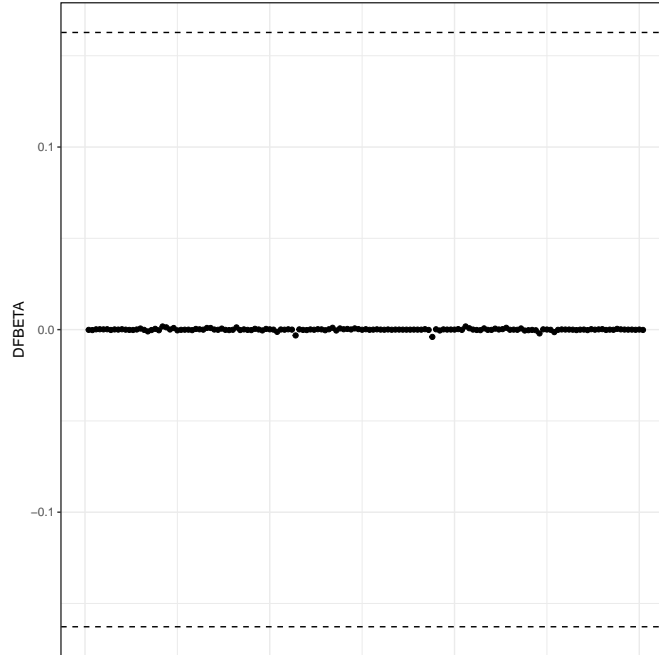

Finally, we reran Model 2 from Table 2 excluding the two issue proposals in the top-right corner of Figure 3(b) with high opposition-to-government issue voting and public support and which were implemented. These issues look like potentially influential points. Table A10 shows the coefficients and Figure A13 shows the marginal effects. As we can see, the magnitude of the interaction coefficient is essentially unchanged. The p-value on the coefficient does increase from 0.042 to 0.077. However, the marginal effects are similar to those including the full dataset. The exclusion of these likely highly influential points thus does little to the results.



Table A10: Model of Policy Implementation Excluding Two Potentially Influential Points

|                                  | Model 1                     |
|----------------------------------|-----------------------------|
| Intercept                        | 0.33 <sup>†</sup><br>(0.18) |
| Public Support (%)               | -0.00<br>(0.00)             |
| Opp-to-Gov IV                    | -0.74<br>(0.52)             |
| Total Changes                    | -1.34<br>(2.44)             |
| Opp-to-Gov IV*Public Support (%) | 0.02 <sup>†</sup><br>(0.01) |
| Total Changes*Public Support (%) | 0.03<br>(0.05)              |
| <i>N</i>                         | 149                         |
| <i>R</i> <sup>2</sup>            | 0.05                        |
| adj. <i>R</i> <sup>2</sup>       | 0.02                        |
| Resid. sd                        | 0.45                        |

Standard errors in parentheses

<sup>†</sup> significant at  $p < .10$ ; \* $p < .05$ ; \*\* $p < .01$ ; \*\*\* $p < .001$

Figure A13: Marginal Effects Excluding Two Potential Influential Points

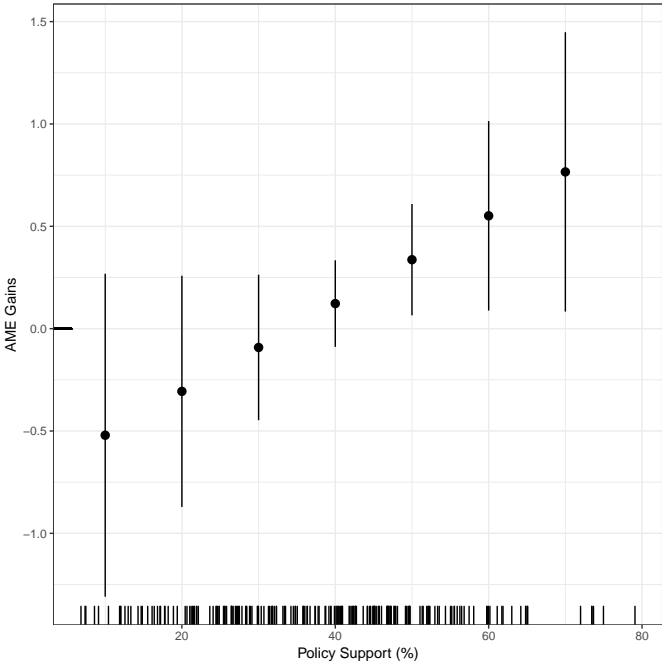

## 14 Models Controlling for Whether the Government is Social Democratic

Social Democratic is a dummy variable coded 1 if the government was formed by the Social Democratic Party.

Table A11: Models of Issue Voting, Public Opinion, and Policy Implementation Controlling for the Partisanship of Government

|                                      | Model 1         | Model 2         | Model 3         |
|--------------------------------------|-----------------|-----------------|-----------------|
| Intercept                            | 0.13<br>(0.35)  | 0.23<br>(0.41)  | 0.22<br>(0.35)  |
| Public Support (%)                   | 0.00<br>(0.01)  | 0.00<br>(0.01)  | 0.00<br>(0.01)  |
| Total IV                             | -0.22<br>(0.19) |                 |                 |
| Opp-to-Govt IV                       |                 | -0.75<br>(0.48) |                 |
| Govt-to-Opp IV                       |                 |                 | -0.09<br>(0.19) |
| Total Changes                        | -0.44<br>(3.33) | -0.55<br>(3.88) | -0.95<br>(3.28) |
| Social Democratic                    | 0.19<br>(0.27)  | 0.05<br>(0.32)  | 0.10<br>(0.27)  |
| Total IV*Public Support (%)          | 0.01<br>(0.00)  |                 |                 |
| Opp-to-Govt IV*Public Support (%)    |                 | 0.02*<br>(0.01) |                 |
| Govt-to-Opp IV*Public Support (%)    |                 |                 | 0.00<br>(0.01)  |
| Total Changes*Public Support (%)     | 0.02<br>(0.07)  | 0.01<br>(0.08)  | 0.01<br>(0.07)  |
| Social Democratic*Public Support (%) | -0.00<br>(0.01) | -0.00<br>(0.01) | -0.00<br>(0.01) |
| <i>N</i>                             | 202             | 151             | 178             |
| <i>R</i> <sup>2</sup>                | 0.04            | 0.06            | 0.02            |
| adj. <i>R</i> <sup>2</sup>           | 0.00            | 0.02            | -0.02           |
| Resid. sd                            | 0.44            | 0.45            | 0.43            |

Standard errors in parentheses

† significant at  $p < .10$ ; \* $p < .05$ ; \*\* $p < .01$ ; \*\*\* $p < .001$

## 15 Models Controlling for Whether the Government is a Minority

Not a Minority is a dummy variable coded 1 if the government was not a minority government.

Table A12: Models of Issue Voting, Public Opinion, and Policy Implementation Controlling Whether the Government was a Minority

|                                   | Model 1 | Model 2 | Model 3           |
|-----------------------------------|---------|---------|-------------------|
| Intercept)                        | 0.33*   | 0.27    | 0.31 <sup>†</sup> |
|                                   | (0.17)  | (0.18)  | (0.16)            |
| Public Support (%)                | -0.00   | -0.00   | -0.00             |
|                                   | (0.00)  | (0.00)  | (0.00)            |
| Total IV                          | -0.23   |         |                   |
|                                   | (0.19)  |         |                   |
| Opp-to-Govt IV                    |         | -0.73   |                   |
|                                   |         | (0.47)  |                   |
| Govt-to-Opp IV                    |         |         | -0.09             |
|                                   |         |         | (0.20)            |
| Total Changes                     | -1.98   | -1.28   | -1.37             |
|                                   | (2.38)  | (2.69)  | (2.36)            |
| Not a Minority                    | -0.03   | 0.10    | -0.07             |
|                                   | (0.24)  | (0.30)  | (0.24)            |
| Total IV*Public Support (%)       | 0.01    |         |                   |
|                                   | (0.00)  |         |                   |
| Opp-to-Govt IV*Public Support (%) |         | 0.02*   |                   |
|                                   |         | (0.01)  |                   |
| Govt-to-Opp IV*Public Support (%) |         |         | 0.00              |
|                                   |         |         | (0.01)            |
| Total Changes*Public Support (%)  | 0.07    | 0.05    | 0.03              |
|                                   | (0.06)  | (0.06)  | (0.06)            |
| Not a Minority*Public Support (%) | -0.00   | -0.01   | 0.00              |
|                                   | (0.01)  | (0.01)  | (0.01)            |
| <i>N</i>                          | 202     | 151     | 178               |
| <i>R</i> <sup>2</sup>             | 0.04    | 0.08    | 0.02              |
| adj. <i>R</i> <sup>2</sup>        | 0.01    | 0.04    | -0.03             |
| Resid. sd                         | 0.44    | 0.45    | 0.43              |

Standard errors in parentheses

<sup>†</sup> significant at  $p < .10$ ; \* $p < .05$ ; \*\* $p < .01$ ; \*\*\* $p < .001$

## 16 Additional information about the data and policy implementation coding

We exclude the 1956 study, because it did not include any question on overall policy orientations that could be used as a control. It also only asked about one policy issue. We do not include more recent election studies because data on policy implementation are not yet available. Twenty-eight

of the SNES questions were about support for status quo policies. In these cases, we recoded them to be about changes away from the status quo. Results are similar when these issue proposals are removed from the dataset.

Coders determined whether each policy proposal was implemented during the relevant government term. One issue when coding implementation is whether to focus on decisions to implement a policy or actual implementation. We have followed this guideline: If the question explicitly is about whether a decision should be made, we have focused on the decision when making the coding. If the question explicitly asks about implementation, we have focused on implementation when making the coding. For most cases focusing on one or the other does not make any difference, but in some cases it does. One example is the question about whether to close down nuclear power plants. A decision to do so was taken but it is not yet implemented. In such cases we have let the nature of the survey question decide whether to focus on decisions or actual implementation.

About 31 percent of the questions ask about relative changes such as levels of taxation, but the majority of questions concern dichotomous outcomes of, for example, implementation of specific laws. We use both types of questions. Since we aim to measure attitudes towards policy *change*, we have switched the values of variables for questions concerning support for status quo policies. Hence, all opinion variables indicate support for policy change and the implementation variables indicate whether policies were changed.

One research assistant was responsible for working with the opinion data and another was responsible for the implementation data. They provided raw data to us that we carefully evaluated. In order to test intra-coder reliability we asked a second research assistant to code a random subset of 25 percent of the questions. For 78 percent of the questions the answers were identical. For half of the questions with divergent answers they were only partially different and for the other half the answers were completely different. Discrepancies mostly occurred because concepts were defined in different ways or because the assistants had turned to different sources. For those questions we used the most reasonable definition and the most credible source for final coding.

Another important issue is whether the set of policy proposals represent a random sample of the total population of issues. This is hard to say since we lack a clear definition of the true population of issues (Burstein, 2003). For example, should it cover proposals that are “on the agenda” in the public, in the media or among political actors? And how should these agendas be defined? These are important questions but they are out of scope for this paper. For the present study we rely on the judgment of the election study principal investigators who identified the relevant issues in each election.

## 17 Analyses of Issue Voting and Responsiveness to High-Income Preferences

To rule out the possibility that our results reflect heightened responsiveness to high-income citizens instead of issue voting, we re-run all our analyses using policy preferences of citizens at the 90th percentile. Consistent with work by Gilens (2012) and Schakel (2019), there is a stronger relationship between high-income preferences and policy implementation than between overall preferences and implementation. However, issue voting still conditions the relationship between high-income policy preferences and implementation, showing that our results cannot be explained by unequal representation.

Figure A14: High-Income Public Support and Issue Voting

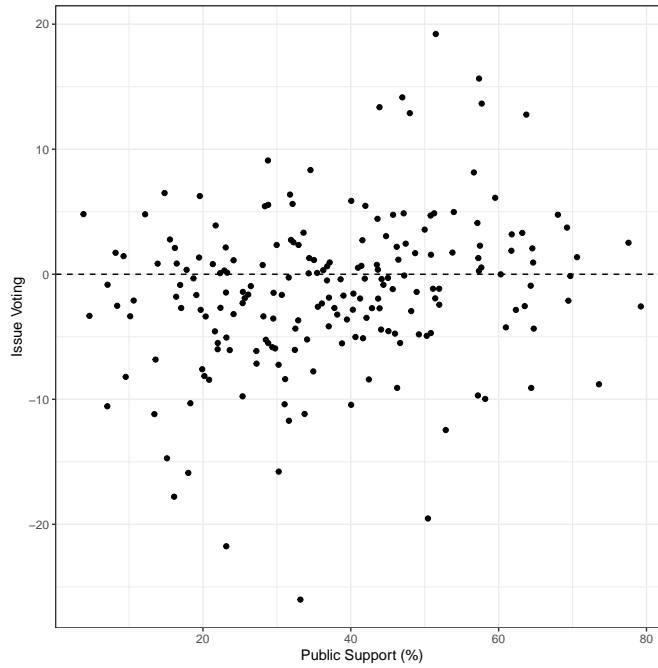

Figure A15: High-Income Public Support For Policy Proposals and their Implementation

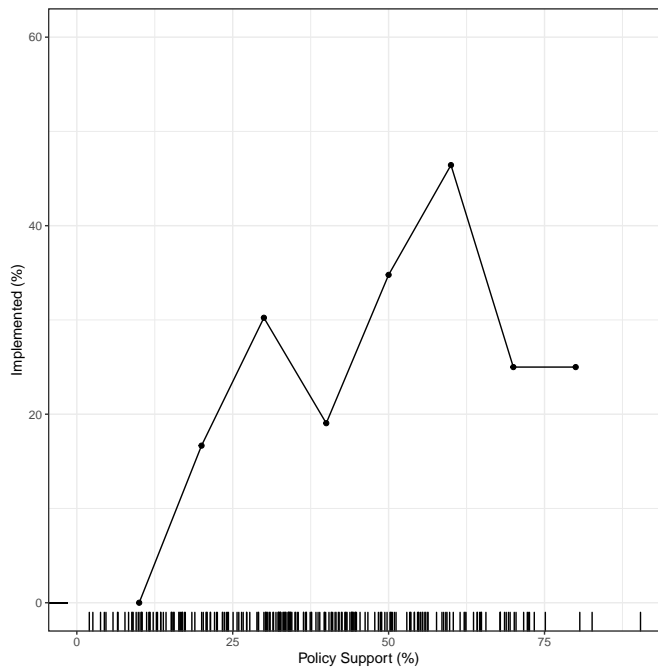

Figure A16: Issue Voting, High-Income Public Support, and Policy Implementation

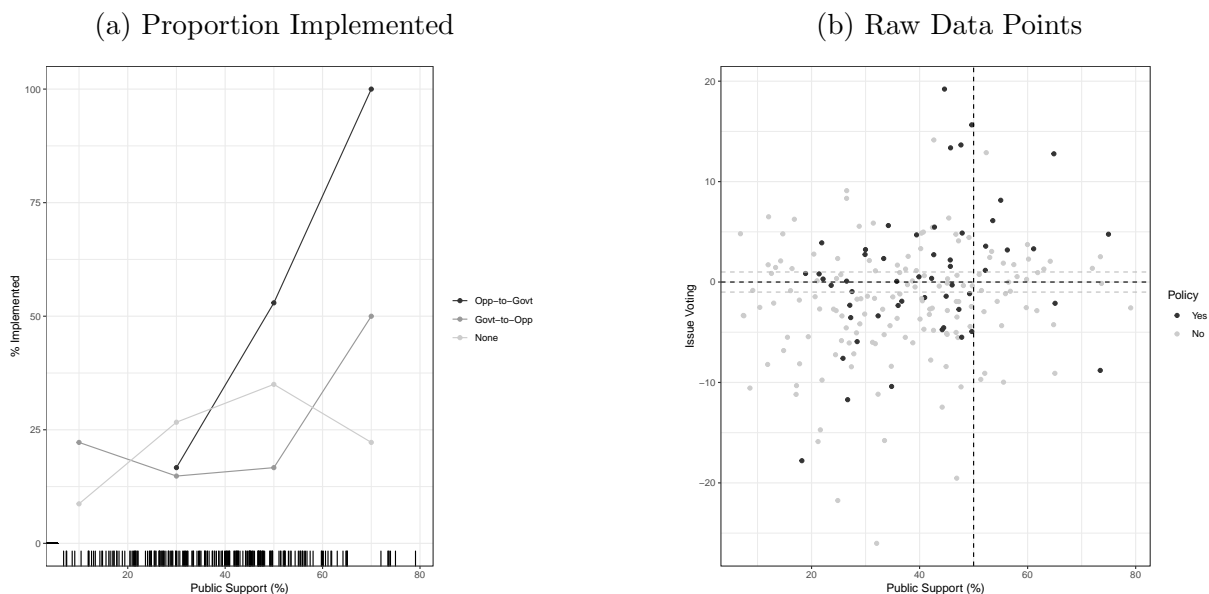

Table A13: Models of Policy Implementation (Using High-Income Preferences)

|                                        | Model 1                     | Model 2                     | Model 3          |
|----------------------------------------|-----------------------------|-----------------------------|------------------|
| Intercept                              | -0.67<br>(0.82)             | -1.11<br>(0.88)             | -0.87<br>(0.81)  |
| High-Income Support (%)                | -0.01<br>(0.02)             | 0.00<br>(0.02)              | -0.00<br>(0.02)  |
| Total IV                               | -1.51<br>(1.04)             |                             |                  |
| Opp-to-Govt IV                         |                             | -4.12<br>(2.70)             |                  |
| Govt-to-Opp IV                         |                             |                             | -0.69<br>(1.10)  |
| Total Changes                          | -12.59<br>(10.83)           | -4.69<br>(11.93)            | -8.89<br>(10.73) |
| Total IV*High-Income Support (%)       | 0.04 <sup>†</sup><br>(0.02) |                             |                  |
| Opp-to-Govt IV*High-Income Support (%) |                             | 0.11 <sup>†</sup><br>(0.06) |                  |
| Govt-to-Opp IV*High-Income Support (%) |                             |                             | 0.01<br>(0.03)   |
| Total Changes*High-Income Support (%)  | 0.34<br>(0.24)              | 0.08<br>(0.26)              | 0.19<br>(0.24)   |
| <i>N</i>                               | 200                         | 150                         | 176              |
| AIC                                    | 230.36                      | 180.79                      | 200.03           |
| BIC                                    | 309.52                      | 253.04                      | 276.12           |
| log <i>L</i>                           | -91.18                      | -66.39                      | -76.01           |

Standard errors in parentheses

<sup>†</sup> significant at  $p < .10$ ; \* $p < .05$ ; \*\* $p < .01$ ; \*\*\* $p < .001$

Figure A17: Types of Issue Voting and the Probability of Policy Implementation (by High Income Public Support)

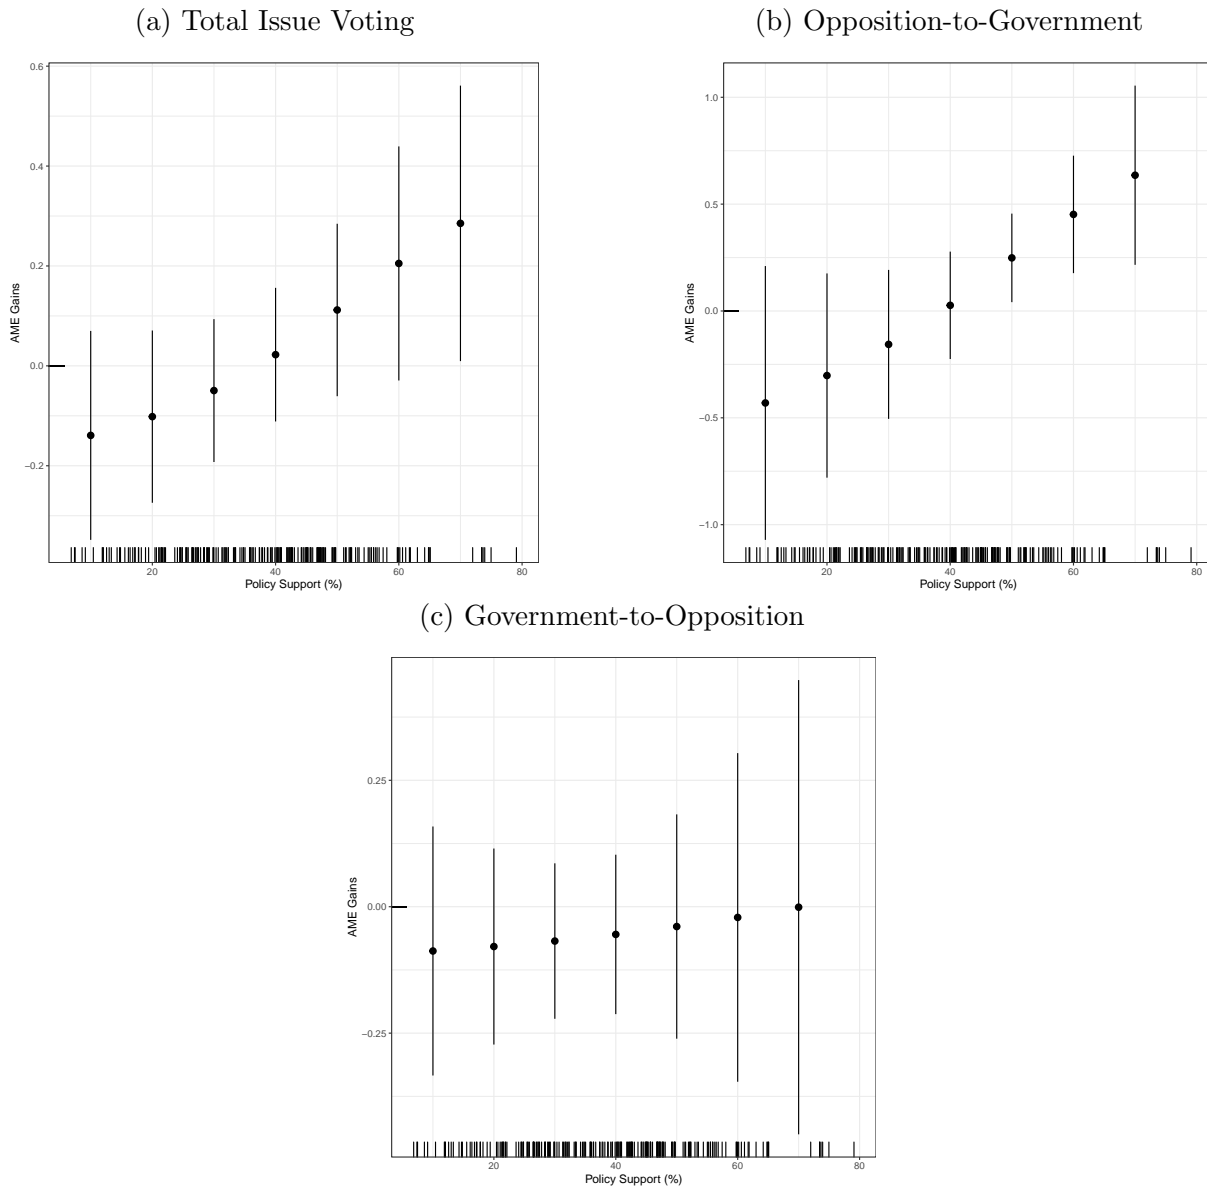

## References

- Ai, Chunrong and Edward C. Norton. 2003. “Interaction Terms in Logit and Probit Models.” *Economics Letters* 80:123–129.
- Belsley, David A., Edwin Kuh and Roy E. Welsch. 1980. *Regression Diagnostics: Identifying Influential Data and Sources of Collinearity*. Hoboken, N.J.: Wiley.
- Berry, William D., Jacqueline H. R. DeMeritt and Justin Esarey. 2010. “Testing for Interaction in Binary Logit and Probit Models: Is a Product Term Essential?” *American Journal of Political Science* 54(1):248–266.

- Berry, William D, Matt Golder and Daniel Milton. 2012. "Improving Tests of Theories Positing Interaction." *The Journal of Politics* 74(3):653–671.
- Burstein, Paul. 2003. "The Impact of Public Opinion on Public Policy: A Review and an Agenda." *Political research quarterly* 56(1):29–40.
- Gilens, Martin. 2012. *Affluence and Influence: Economic Inequality and Political Power in America*. Princeton, N.J; New York: Princeton University Press; Russell Sage Foundation.
- Schakel, Wouter. 2019. "Unequal policy responsiveness in the Netherlands." *Socio-Economic Review*
